# Supplementary material for: Polarization- and Chaos-Game-Based Fingerprinting of Molecular Targets of Listeria Monocytogenes Vaccine and Fully Virulent Strains
Source: MDPI journal article supplement (doi:10.3390/cimb45120628), 2023-12-13
Supplement: s1 [file s1]

# Supplementary Materials to “Polarization- and chaos-game-based fingerprinting of molecular targets of *Listeria monocytogenes* vaccine and fully-virulent strains”

**Dmitry A. Zimnyakov<sup>1,2</sup>, Marina V. Alonova<sup>1</sup>, Maxim S. Lavruchin<sup>2</sup>, Anna M. Lyapina<sup>2</sup> and Valentina A. Feodorova<sup>2,3,\*</sup>**

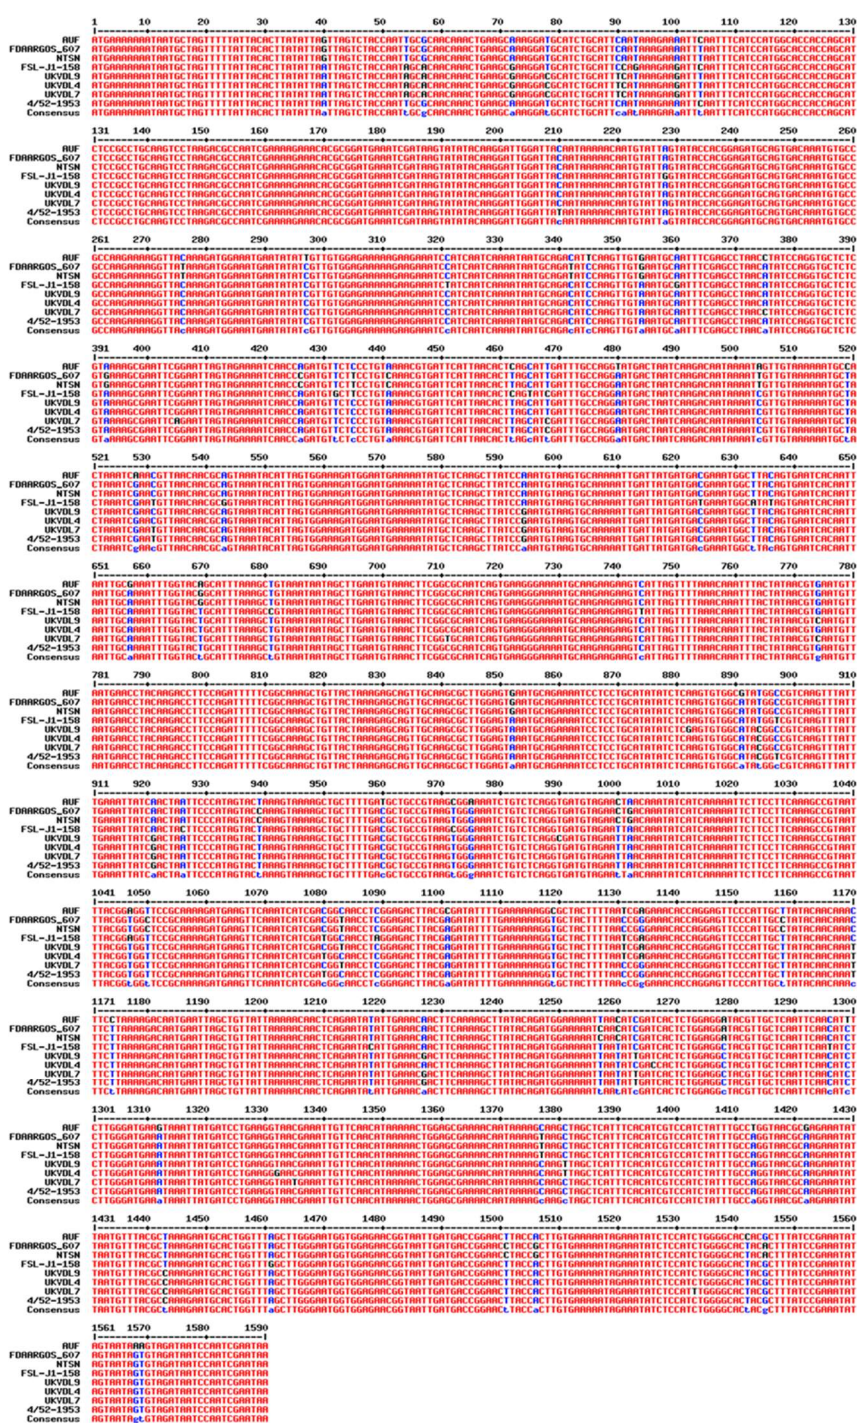

(a)



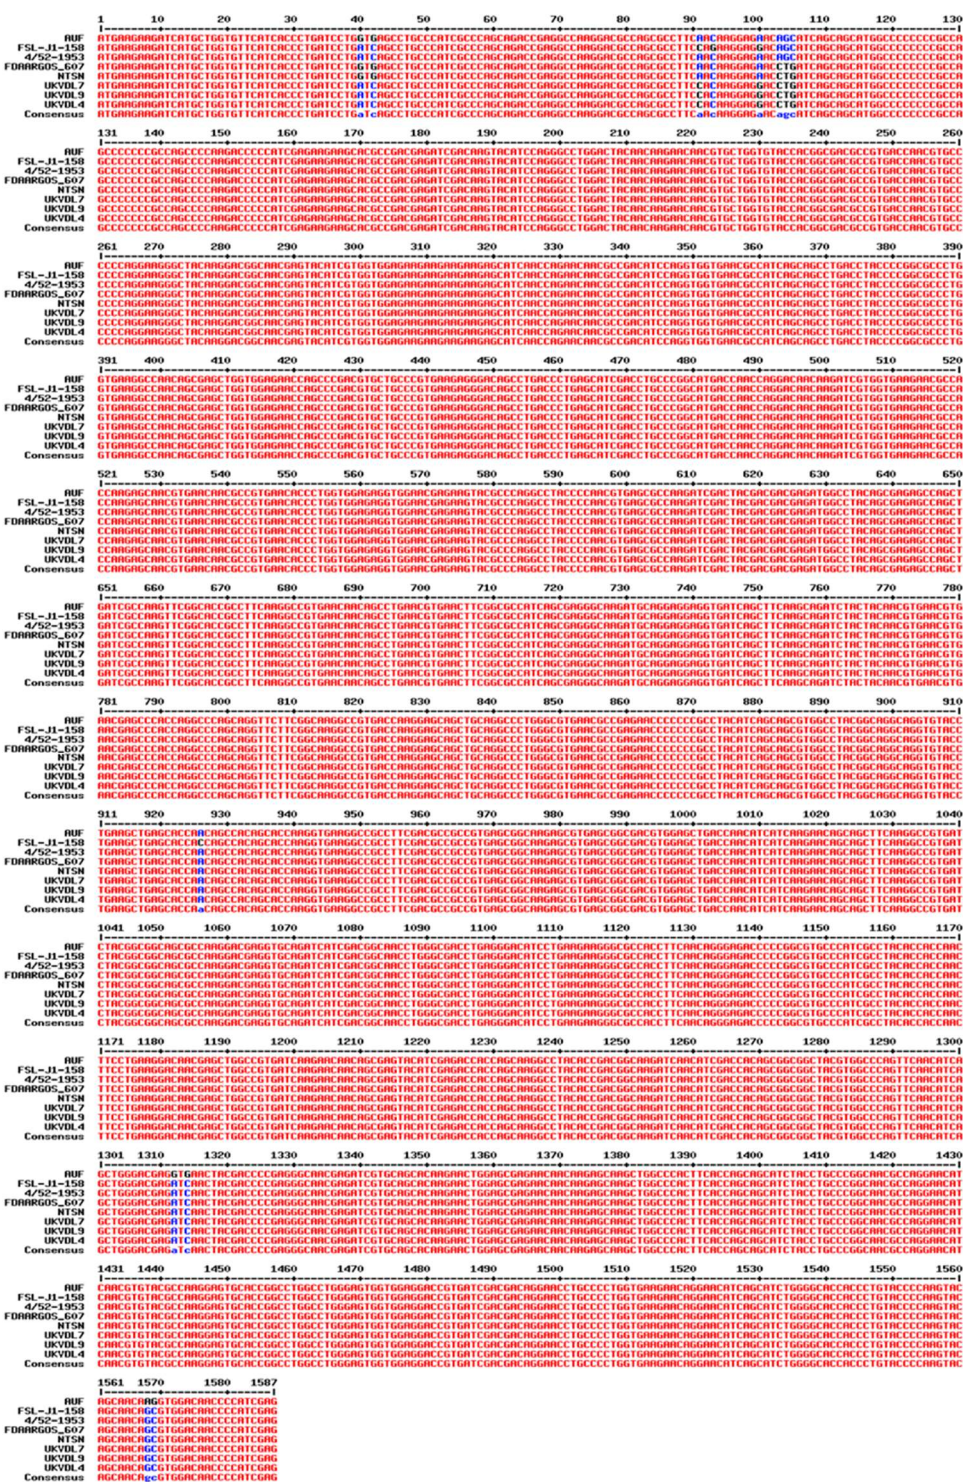

(b)

Figure S1. Multiple sequence alignments of the original (a) *hly* gene nucleotide sequences of the *L. monocytogenes* vaccine strain AUF and seven wild type *L. monocytogenes* strains of zoonotic origin and artificially generated sequences (b) obtained using Multalin online service (<http://multalin.toulouse.inra.fr/multalin/>). The SNPs are colored in blue.

**Table S1. The homology level between the original AUF reference hly gene sequences and those derived from wild type *L. monocytogenes* strains of zoonotic origin (Fig. S1, a)**

| ## | <i>L. monocytogenes</i> strain | Number of SNPs/mutations comparing to the AUF | Identity value between AUF and wild type <i>L. monocytogenes</i> strains sequences* |
|----|--------------------------------|-----------------------------------------------|-------------------------------------------------------------------------------------|
| 1  | AUF                            | 0                                             | 100% (1590/1590)                                                                    |
| 2  | FSL-J1-158                     | 56                                            | 96.5% (1534/1590)                                                                   |
| 3  | FDAARGOS_607                   | 44                                            | 97.2% (1546/1590)                                                                   |
| 4  | NTSN                           | 44                                            | 97.2% (1546/1590)                                                                   |
| 5  | UKVDL9                         | 51                                            | 96.8% (1539/1590)                                                                   |
| 6  | UKVDL4                         | 48                                            | 97.0% (1542/1590)                                                                   |
| 7  | 4/52-1953                      | 45                                            | 97.2% (1545/1590)                                                                   |
| 8  | UKVDL7                         | 55                                            | 96.5% (1535/1590)                                                                   |

\* Using the EMBOSS Needle on-line tool ([https://www.ebi.ac.uk/Tools/psa/emboss\\_needle/](https://www.ebi.ac.uk/Tools/psa/emboss_needle/))

**Table S2. The homology level between the artificially generated sequences (Fig. S1, b)**

| ## | Original sequence | Number of SNPs/mutations comparing to the AUF | Identity value between AUF and wild type <i>L. monocytogenes</i> strains sequences* |
|----|-------------------|-----------------------------------------------|-------------------------------------------------------------------------------------|
| 1  | AUF               | 0                                             | 100% (1587/1587)                                                                    |
| 2  | FSL-J1-158        | 10                                            | 99.4% (1577/1587)                                                                   |
| 3  | FDAAR-GOS_607     | 7                                             | 99.6% (1580/1587)                                                                   |
| 4  | NTSN              | 7                                             | 99.6% (1580/1587)                                                                   |
| 5  | UKVDL9            | 11                                            | 99.3% (1576/1587)                                                                   |
| 6  | UKVDL4            | 11                                            | 99.3% (1576/1587)                                                                   |
| 7  | 4/52-1953         | 6                                             | 99.6% (1581/1587)                                                                   |
| 8  | UKVDL7            | 11                                            | 99.3% (1576/1587)                                                                   |

\* Using the EMBOSS Needle on-line tool ([https://www.ebi.ac.uk/Tools/psa/emboss\\_needle/](https://www.ebi.ac.uk/Tools/psa/emboss_needle/))

**Table S3. The pairwise differences in nucleotides for the original hly *L. monocytogenes* gene sequences (Fig. S1, a; Table S1)**

|   | 1  | 2  | 3  | 4  | 5  | 6  | 7  | 8  |
|---|----|----|----|----|----|----|----|----|
| 1 | 0  | 56 | 44 | 44 | 51 | 48 | 45 | 55 |
| 2 | 56 | 0  | 54 | 54 | 41 | 36 | 37 | 43 |
| 3 | 44 | 54 | 0  | 0  | 43 | 42 | 37 | 45 |
| 4 | 44 | 54 | 0  | 0  | 43 | 42 | 37 | 45 |
| 5 | 51 | 41 | 43 | 43 | 0  | 9  | 20 | 12 |
| 6 | 48 | 36 | 42 | 42 | 9  | 0  | 19 | 17 |
| 7 | 45 | 37 | 37 | 37 | 20 | 19 | 0  | 18 |
| 8 | 55 | 43 | 45 | 45 | 12 | 17 | 18 | 0  |

**Table S4. The pairwise differences in nucleotides for artificially generated sequences (Fig. S1, b; Table S2)**

|   | 1  | 2  | 3 | 4 | 5  | 6  | 7 | 8  |
|---|----|----|---|---|----|----|---|----|
| 1 | 0  | 10 | 7 | 7 | 11 | 11 | 6 | 11 |
| 2 | 10 | 0  | 9 | 9 | 5  | 5  | 4 | 5  |
| 3 | 7  | 9  | 0 | 0 | 4  | 4  | 5 | 4  |
| 4 | 7  | 9  | 0 | 0 | 4  | 4  | 5 | 4  |
| 5 | 11 | 5  | 4 | 4 | 0  | 0  | 5 | 0  |
| 6 | 11 | 5  | 4 | 4 | 0  | 0  | 5 | 0  |
| 7 | 6  | 4  | 5 | 5 | 5  | 5  | 0 | 5  |
| 8 | 11 | 5  | 4 | 4 | 0  | 0  | 5 | 0  |
